# Supplementary material for: Macrophage-Induced Exacerbation of Nasopharyngeal Inflammatory Lymphocytes in COVID-19 Disease
Source: MDPI journal article supplement (doi:10.3390/covid3040041), 2023-04-13
Supplement: s1 [file s1]

Archive with 2 entries (2 files):
- supplementary figures and legends03312023.pdf
- Supplementary Tables_V3_041223_tri.pdf
