# Supplementary material for: Macrophage-Induced Exacerbation of Nasopharyngeal Inflammatory Lymphocytes in COVID-19 Disease
Source: MDPI journal article supplement (doi:10.3390/covid3040041), 2023-04-13
Supplement: s1 [file s1]

## Supplementary Figures

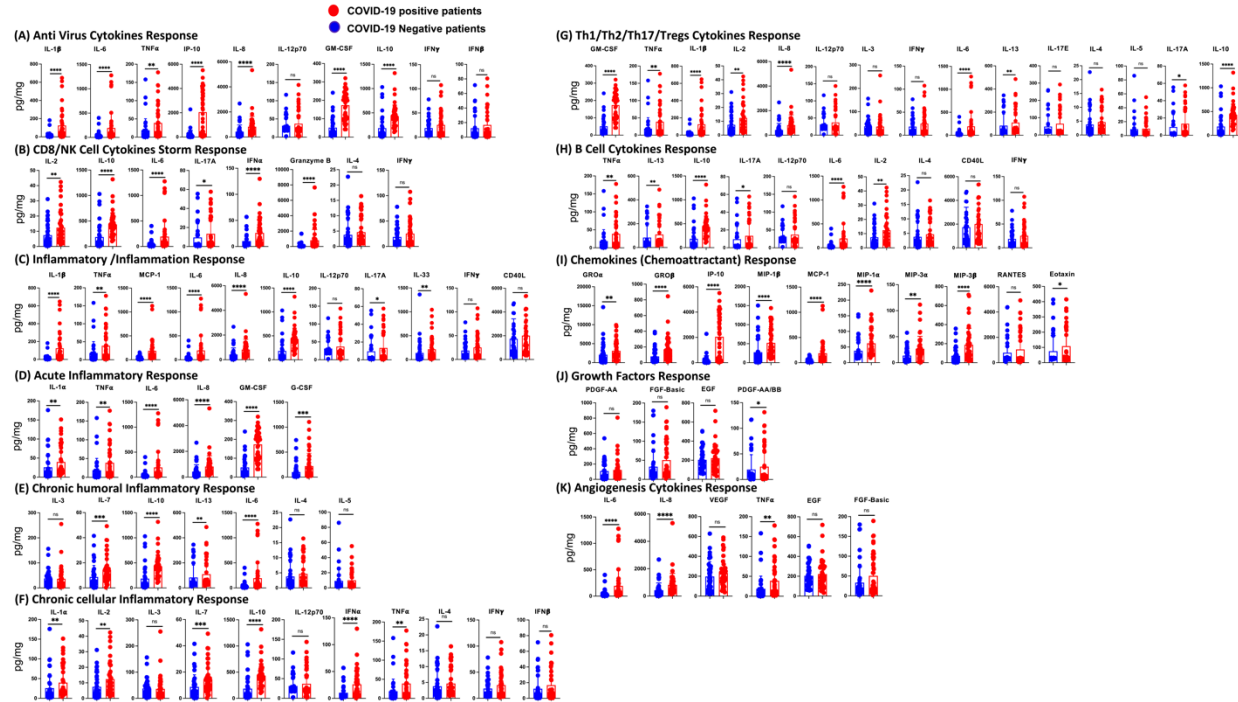

**Supplementary Figure S1:** The COVID-19 cytokine/chemokine storm in the nasopharyngeal microenvironment belongs to the responses, (A) Anti-virus cytokines, (B) CD8/NK cell cytokines storm, (C) Inflammatory /inflammation, (D) Acute inflammatory, (E) Chronic humoral inflammatory, (F) Chronic cellular inflammatory, (G) Th1/Th2/Th17/Tregs cytokines, (H) B cell cytokines, (I) Chemokines (Chemoattractant), (J) Growth factors, and (K) Angiogenesis cytokines. (A-K) Cytokine storm in nasal swabs of COVID-19 positive (N = 44) and negative (N = 40) patients was measured by a bead-based multiplex assay and analyzed by FLEXMAP 3D. Each dot represents an individual.

A)

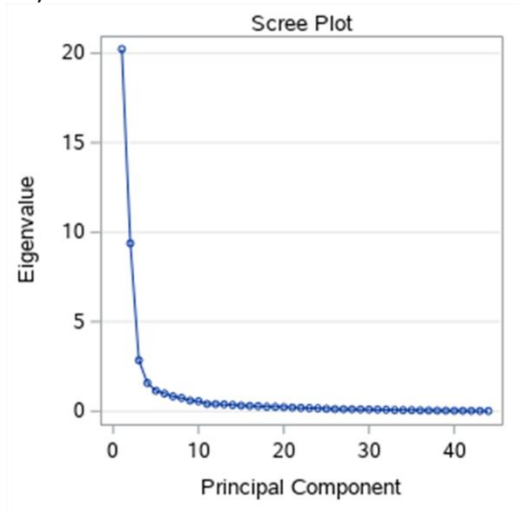

B)

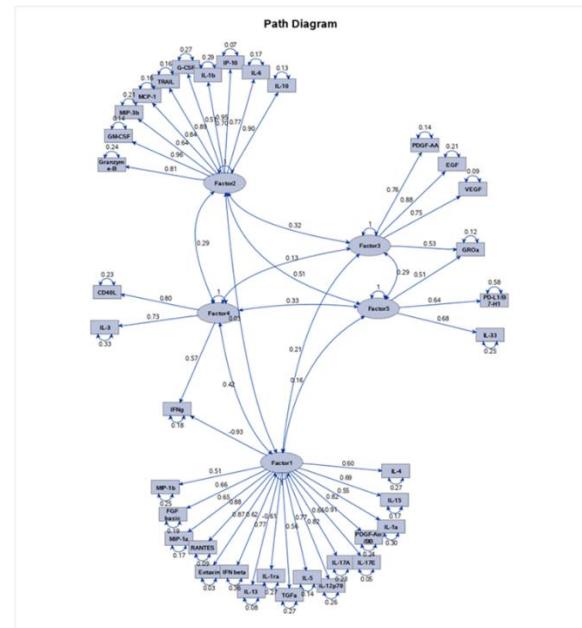

**Supplementary Figure S2:** Exploratory factor analysis. A) Principal component scree plot. Scree plot showed the eigenvalue for each principal component using 44 cytokine data. Eigenvalue > 1 was used to select the optimal number of principal components, which resulted in five factors. B) Path diagram for factor analysis. Path diagram showed the quartimin-rotated factor solution and represented correlations among factors by double-headed links or paths and factor variance and error variances by double-headed links. Factors with lower explained variance have smaller magnitude loadings. The path diagram displayed only the links that have loading greater than 0.5 in magnitude.

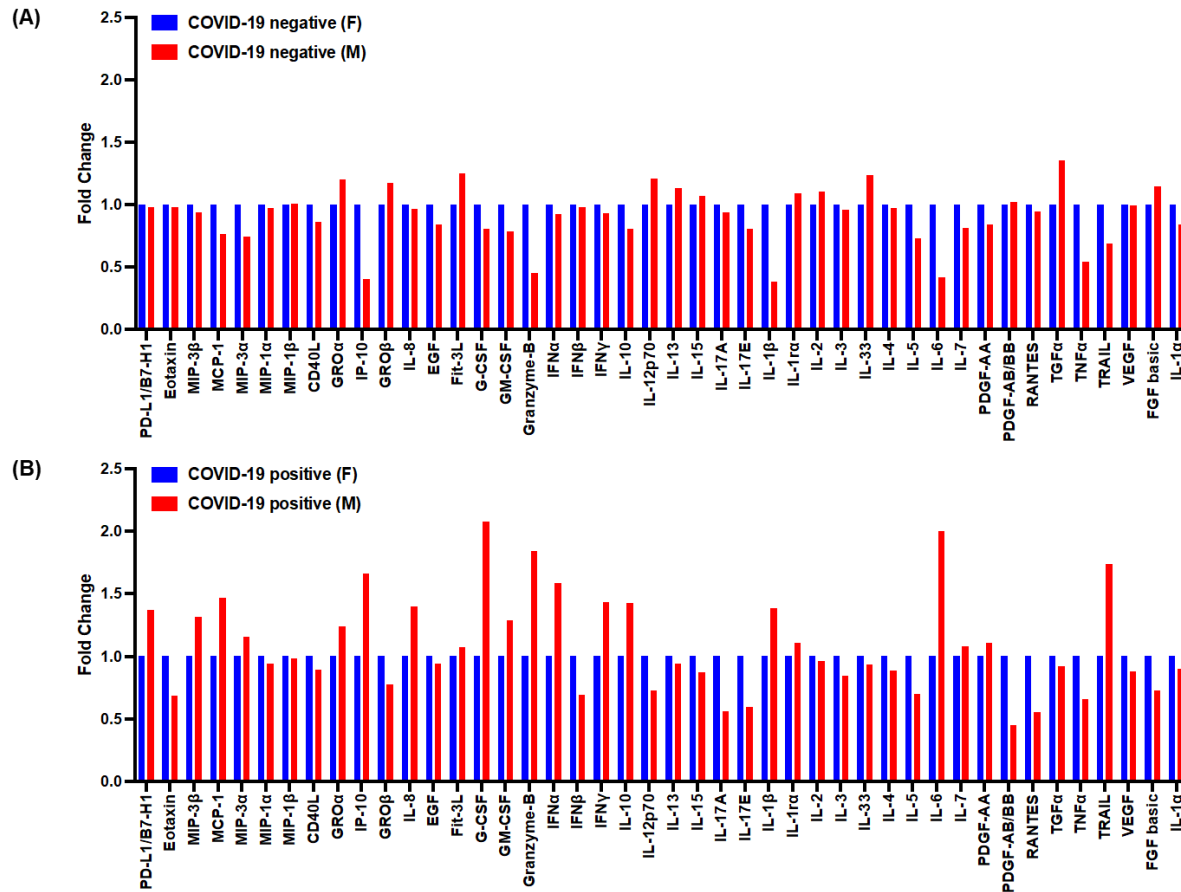

**Supplementary Figure S3:** The nasopharyngeal cytokines/chemokines storm is associated with male gender susceptibility to being infected by the SARS-CoV-2. The fold change of cytokines/chemokines in **(A)** COVID-19 negative male versus female and **(B)** COVID-19 positive male versus female.

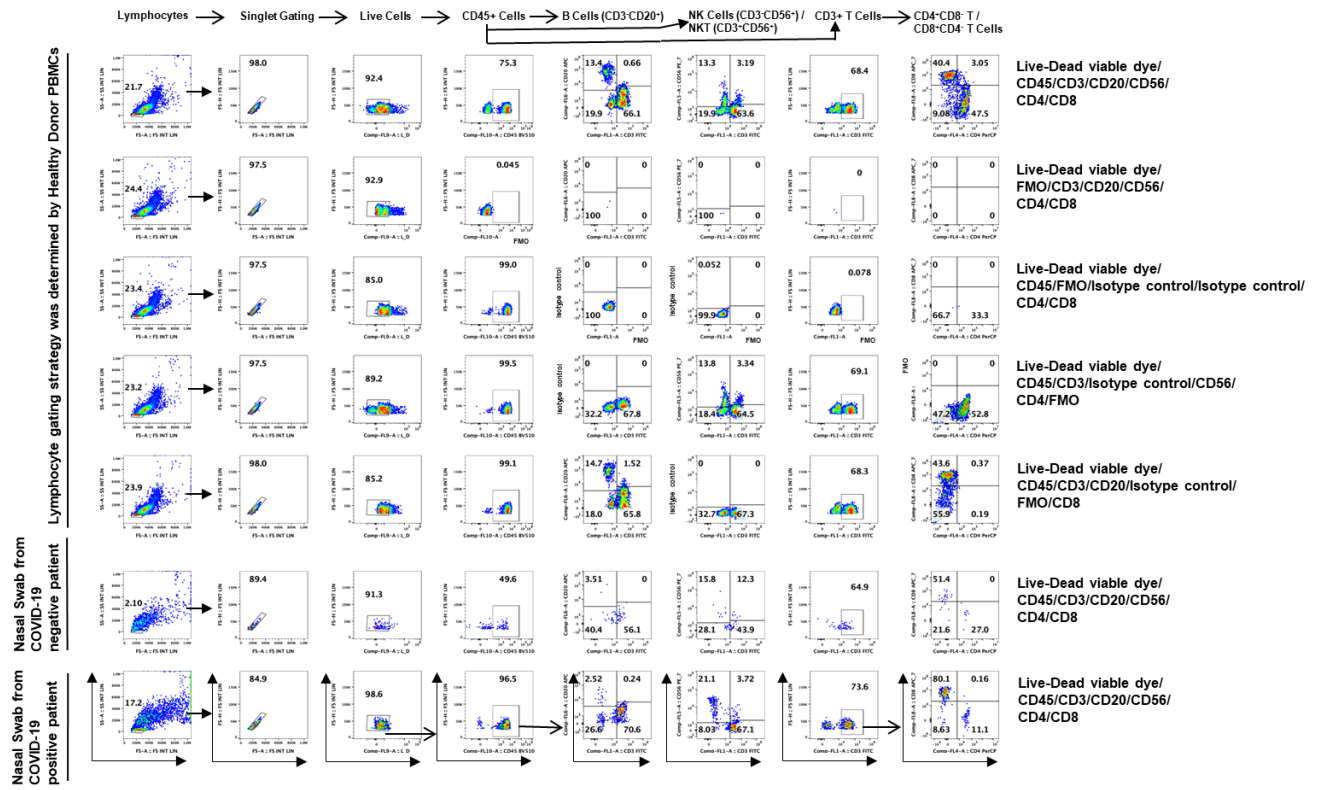

**Supplementary Figure S4.** A representative gating strategy illustrating the lymphocyte population being subgated to the level of CD3<sup>+</sup>CD20<sup>+</sup> B cells, CD3<sup>+</sup>CD56<sup>+</sup> (NK), CD3<sup>+</sup>CD56<sup>+</sup> (NKT), CD3<sup>+</sup> T cells, CD3<sup>+</sup>CD4<sup>+</sup>CD8<sup>+</sup> T cells, and CD3<sup>+</sup>CD4<sup>+</sup>CD8<sup>+</sup> T cells.

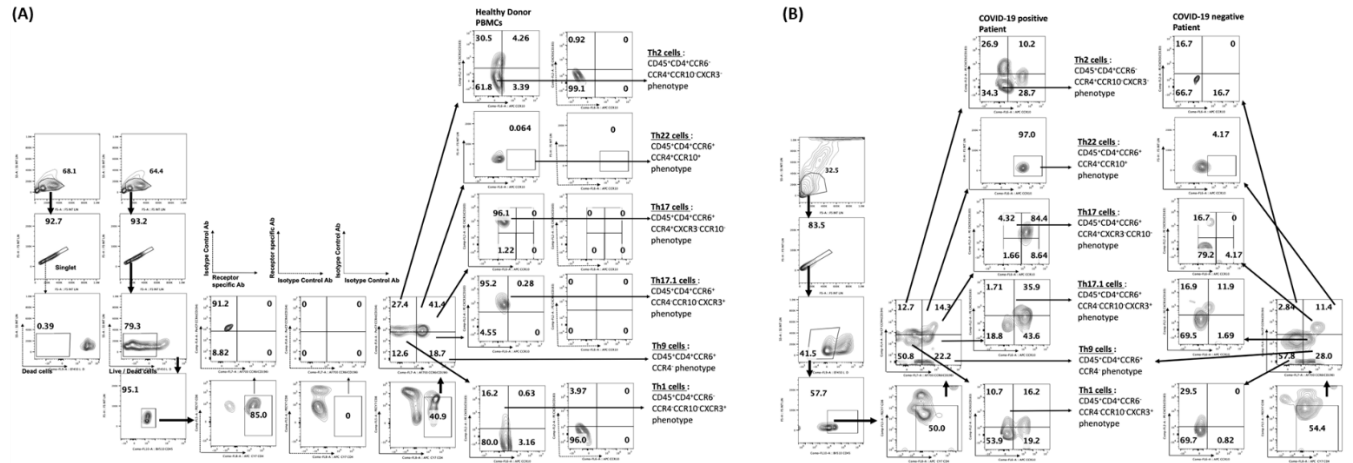

**Supplementary Figure S5.** Gating strategy for assessing the percentages of T cell subsets (Th2, Th22, Th17, Th17.1, Th9, and Th1) in nasopharyngeal swabs of COVID-19 positive and negative patients. (A) Healthy donor PBMCs were stained to determine the gating of T cell subsets and a similar gating strategy was used to determine T cell subsets in (B) nasopharyngeal swabs of COVID-19-positive and negative patients. The dotted arrow denotes staining with isotype control antibodies. The solid arrow shows staining with receptor-specific antibodies.

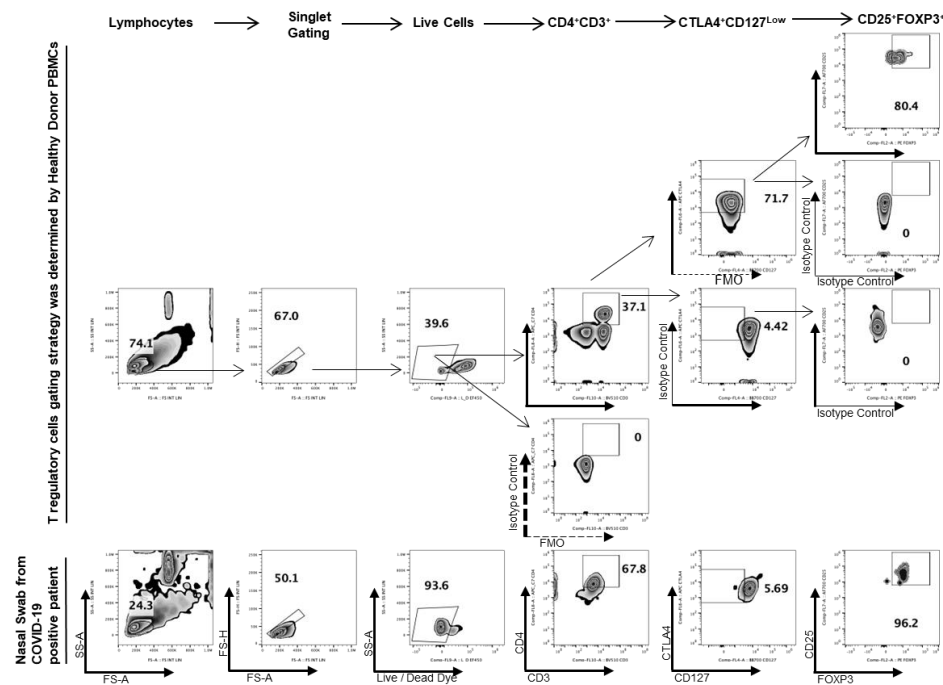

**Supplementary Figure S6.** A representative gating strategy illustrating the T regulatory cells (Tregs) lymphocyte subset being gated to the level of CD3<sup>+</sup>CD4<sup>+</sup>CTLA4<sup>+</sup>CD127<sup>Low</sup>CD25<sup>+</sup>FOXP3<sup>+</sup>.

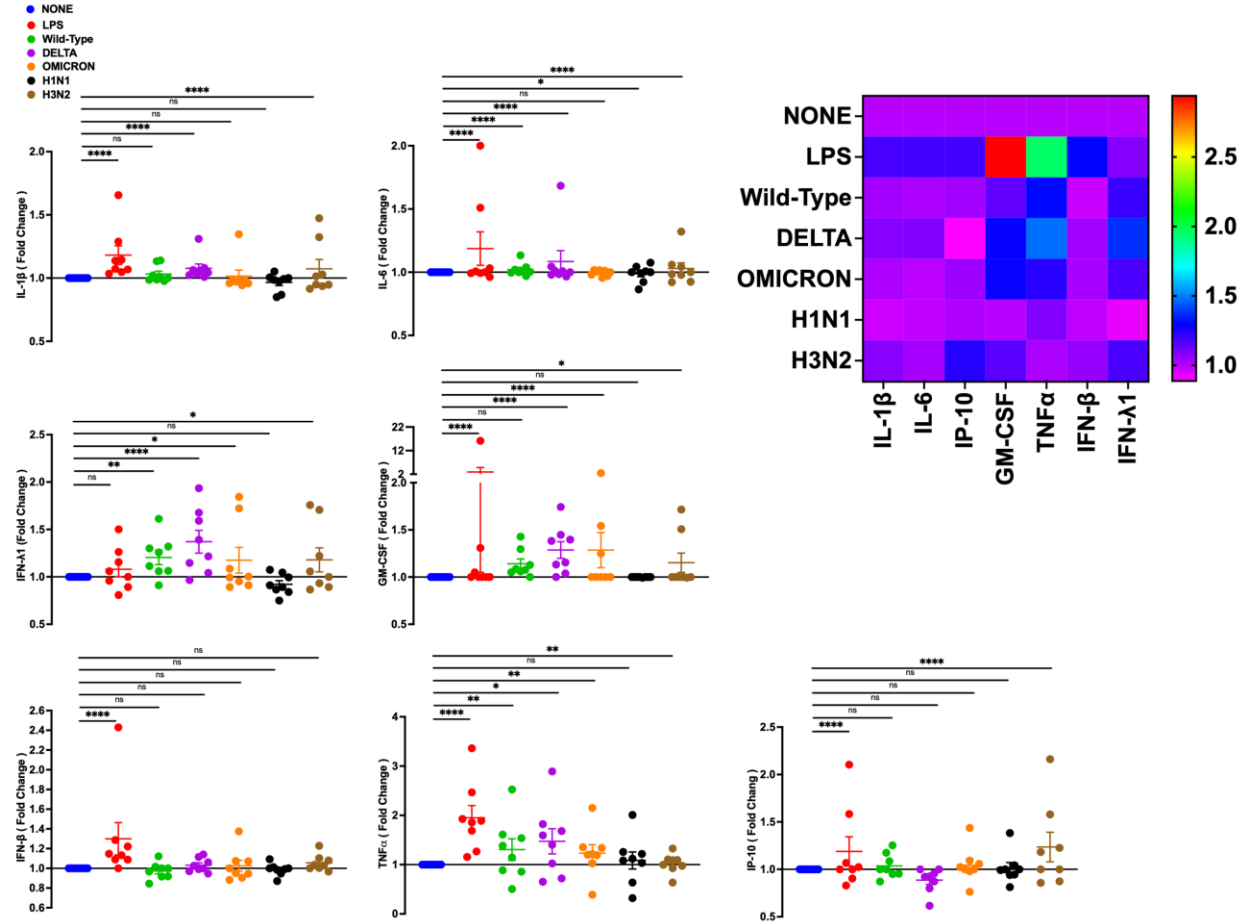

**Supplementary Figure S7.** Human PBMCs from healthy donors (n=8) cultured in the presence or absence of S protein of the SARS-CoV-2 wild-type strain, Delta- and Omicron-variants as well as H1N1 and H3N2 at 37°C for 48 hr. The amount of cytokines secreted from PBMCs was assessed by the LEGENDplex Human Inflammation kit. Soluble analytes were quantified using flow cytometry and analyzed with BioLegend's LEGENDplex™ software. **(A)** The fold-change of cytokines normalized by none (unstimulated) and **(B)** the heatmap of the fold-change of cytokines. Data are expressed as mean  $\pm$ SD. The  $p$  values were determined with unpaired Student t test. \* $p < 0.05$ , \*\* $p < 0.01$  and \*\*\*\* $p < 0.0001$ .

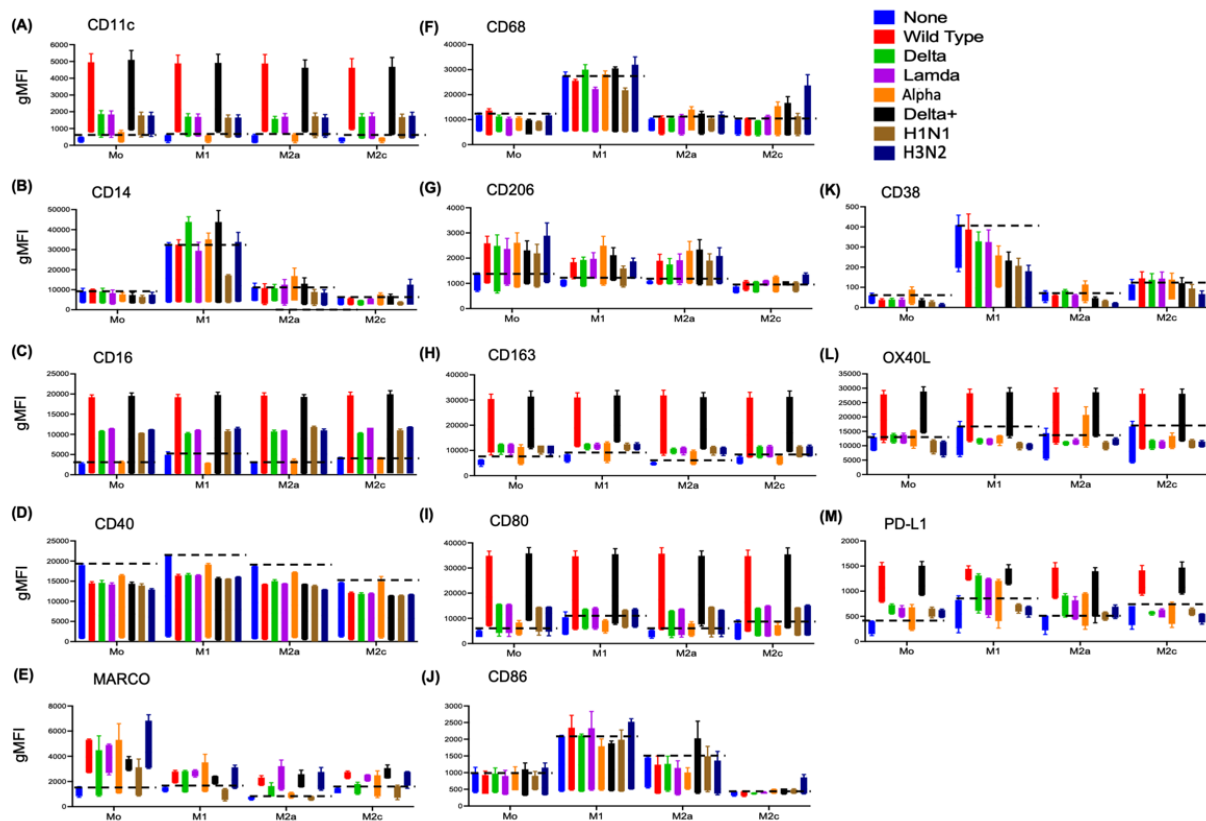

**Supplementary Figure S8.** Macrophage (M $\phi$ ) subtypes in lymphocyte dysregulation during SARS-CoV-2 infection. Human monocyte-derived M $\phi$  (hMDM $\phi$ ) from PBMCs of 8 individual donors were polarized into M1, M2a, or M2c phenotype for 48 hrs. Unpolarized hMDM $\phi$  was used as a control and considered M0. Macrophage subtypes stimulated in the presence or absence of SARS-CoV-2 spike (S) protein from the wild type of strain as well as Delta-, Lamda-, Alpha-, and Delta+-variants or positive controls such as hemagglutinin/HA antigen protein from H1N1 and H3N2 influenza A for 48 hrs. The expression of macrophage activation markers was assessed by flow cytometry. Data are shown in geometric mean fluorescence intensity (gMFI) belong to 8 individual donors' M $\phi$ .



**(A) CD4<sup>+</sup> T cell cytokines**

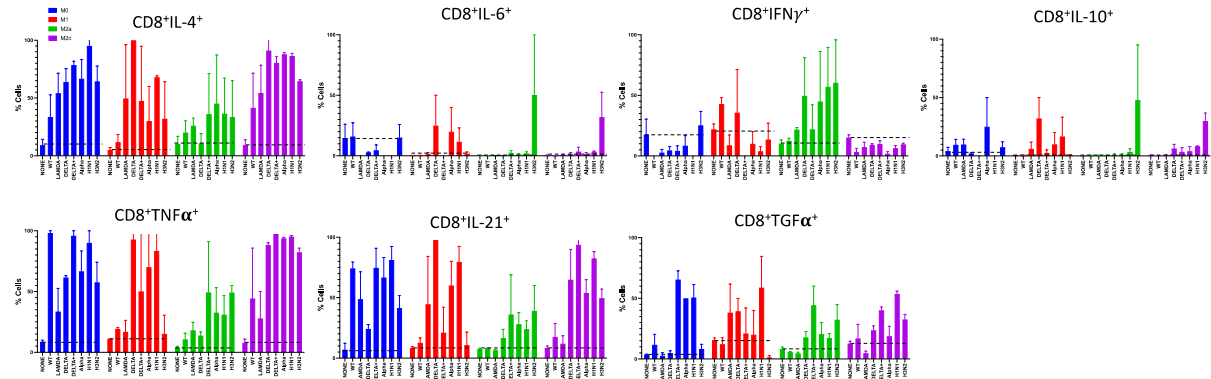

**(B) CD8<sup>+</sup> T cell cytokines**

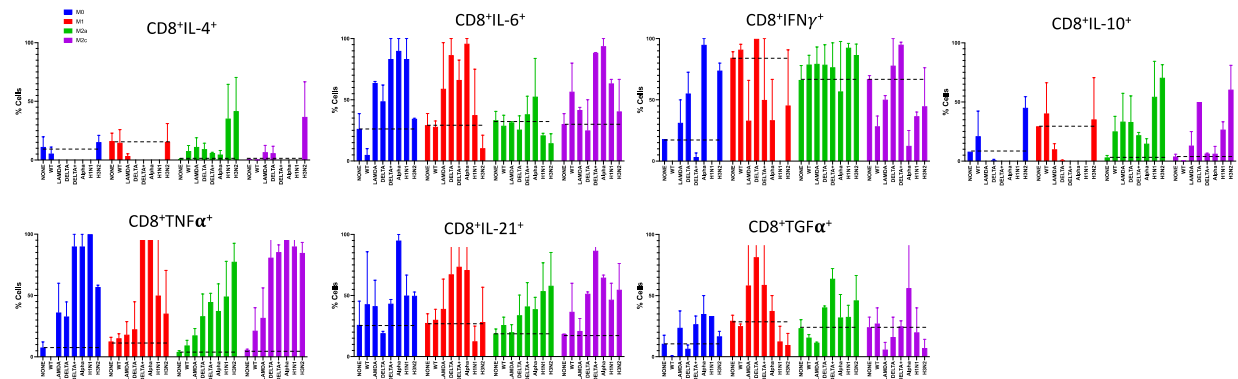

**Supplementary Figure S9.** Macrophage subtypes of SARS-CoV-2 infection affect T-cell cytokines responses. Human monocyte-derived M $\phi$  (hMDM $\phi$ ) from PBMCs of 8 individual donors were polarized into M1, M2a, or M2c phenotype for 48 hrs. Unpolarized hMDM $\phi$  was used as a control and considered M0. Macrophage subtypes stimulated in the presence or absence of SARS-CoV-2 spike (S) protein from the wild type strain as well as Delta-, Lambda-, Alpha-, and Delta+-variants or positive controls such as hemagglutinin/HA antigen protein from H1N1 and H3N2 influenza A for 48 hrs followed by autologous human PBMCs co-culture. **(A)** CD4<sup>+</sup> and **(B)** CD8<sup>+</sup> T cell cytokines were assessed by flow cytometry. Each bar represents percent frequency of cells that belong to 8 individual donors' M $\phi$  co-cultured with PBMCs.

**(A) CD4<sup>+</sup> T cell cytokines**

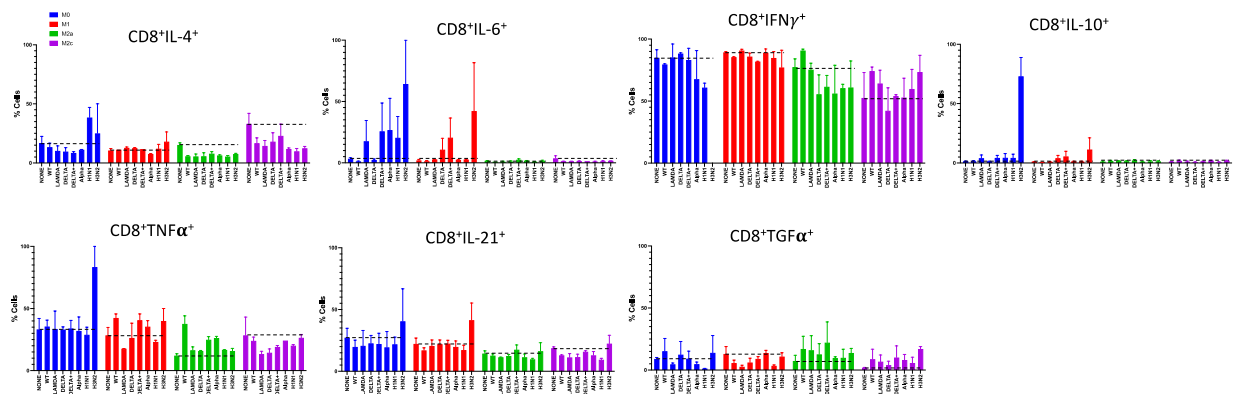

**(B) CD8<sup>+</sup> T cell cytokines**

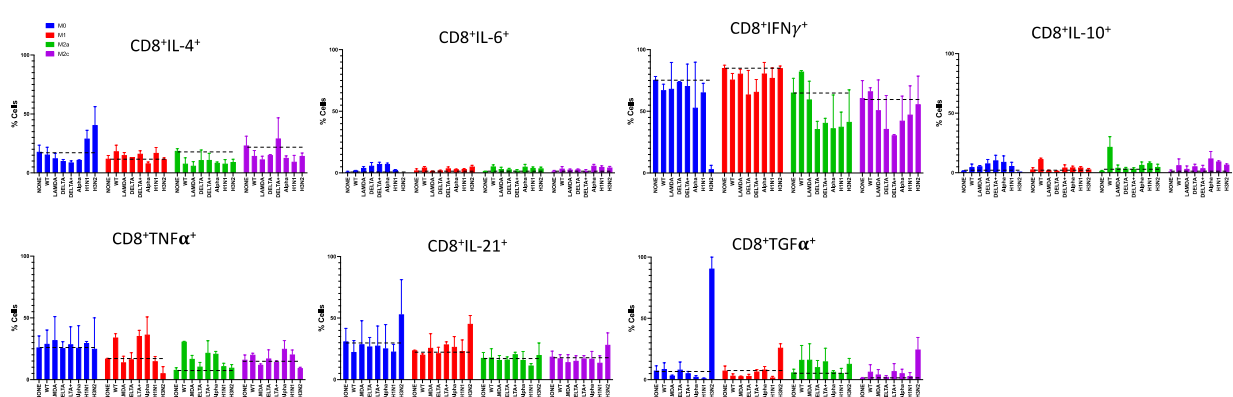

**Supplementary Figure S10.** Macrophage subtypes of SARS-CoV-2 infection affect T-cell cytokines responses. Human monocyte-derived M $\phi$  (hMDM $\phi$ ) PBMCs of 8 individual donors were polarized into M1, M2a, or M2c phenotype for 48 hrs. Unpolarized hMDM $\phi$  was used as a control and considered M0. Macrophage subtypes stimulated in the presence or absence of SARS-CoV-2 spike (S) protein from the wild type strain as well as Delta-, Lamda-, Alpha-, and Delta+-variants or positive controls such as hemagglutinin/HA antigen protein from H1N1 and H3N2 influenza A for 48 hrs followed by co-culture of enriched autologous T cells from human PBMCs. **(A)** CD4<sup>+</sup> and **(B)** CD8<sup>+</sup> T cell cytokines were assessed by flow cytometry. Each bar represents percent frequency of cells that belong to 8 individual donors' M $\phi$  co-cultured with PBMCs.

CD8<sup>+</sup> T cell cytokines

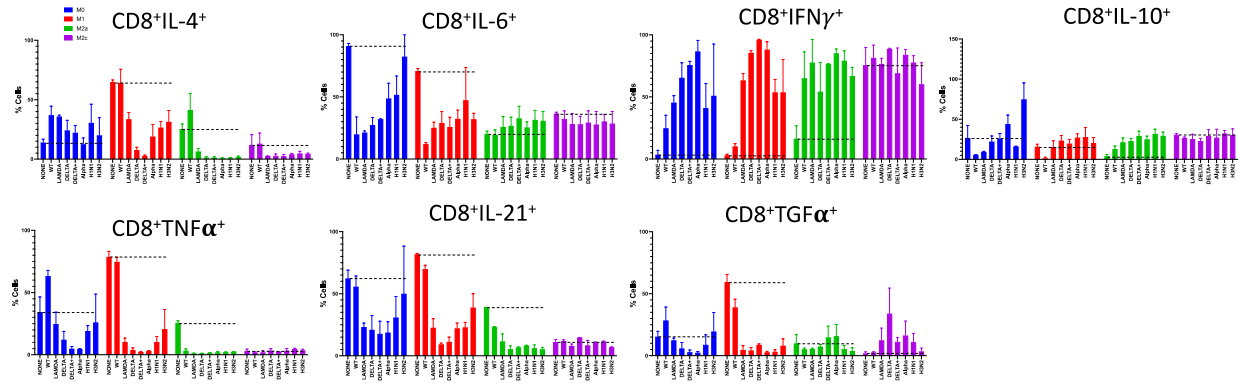

**Supplementary Figure S11.** Macrophage subtypes of SARS-CoV-2 infection affect T-cell cytokines responses. Human monocyte-derived M $\phi$  (hMDM $\phi$ ) were polarized into M1, M2a, or M2c phenotype for 48 hrs. Unpolarized hMDM $\phi$  was used as a control and considered M0. Macrophage subtypes stimulated in the presence or absence of SARS-CoV-2 spike (S) protein from the wild type strain as well as Delta-, Lamda-, Alpha-, and Delta+-variants or positive controls such as hemagglutinin/HA antigen protein from H1N1 and H3N2 influenza A for 48 hrs followed by co-culture of enriched autologous CD8 T cells from human PBMCs. CD8<sup>+</sup> T cell cytokines were assessed by flow cytometry. Each bar represents percent frequency of cells that belong to 8 individual donors' M $\phi$  co-cultured with PBMCs.

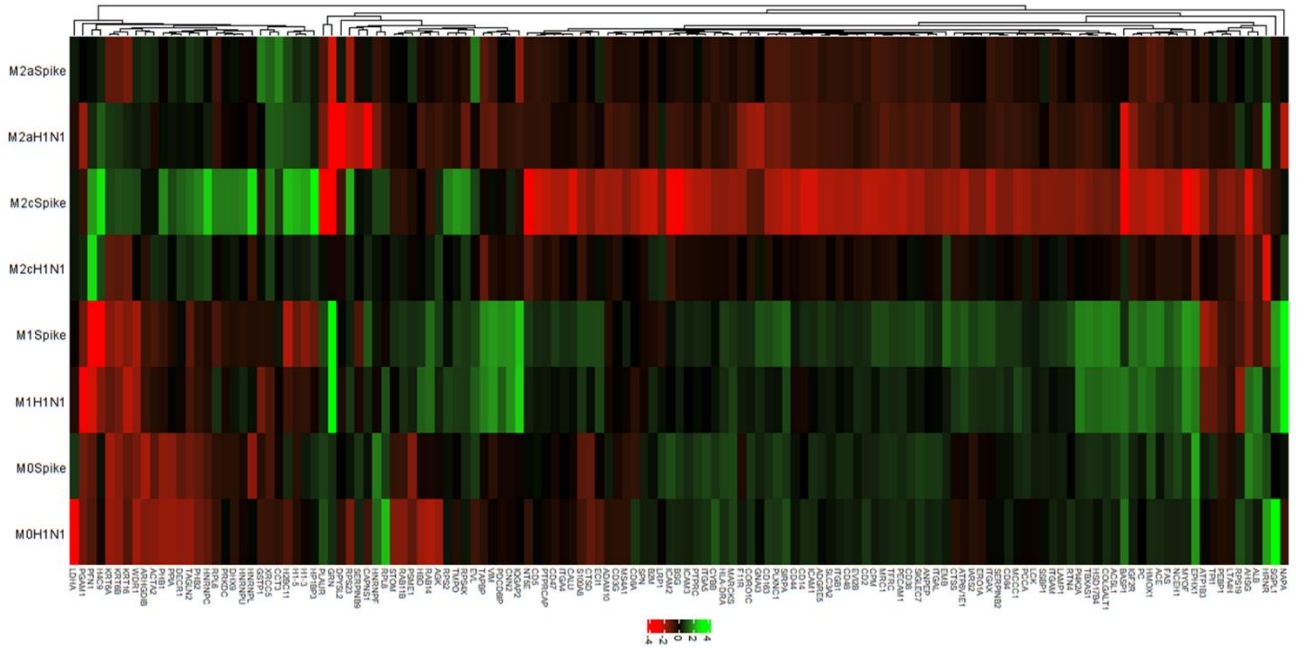

**Supplementary Figure S12.** Macrophage subtypes modulate immune-related protein interaction networks in CD8 T lymphocytes during SARS-CoV-2 infection. Heatmap of the differentially up- and down-regulated proteins in CD8 T cells cocultured with macrophage subsets stimulated in the presence of SARS-CoV-2 S protein or HA protein of H1N1. Color range illustrates the log<sub>2</sub> fold change between the stimulated and unstimulated macrophages.

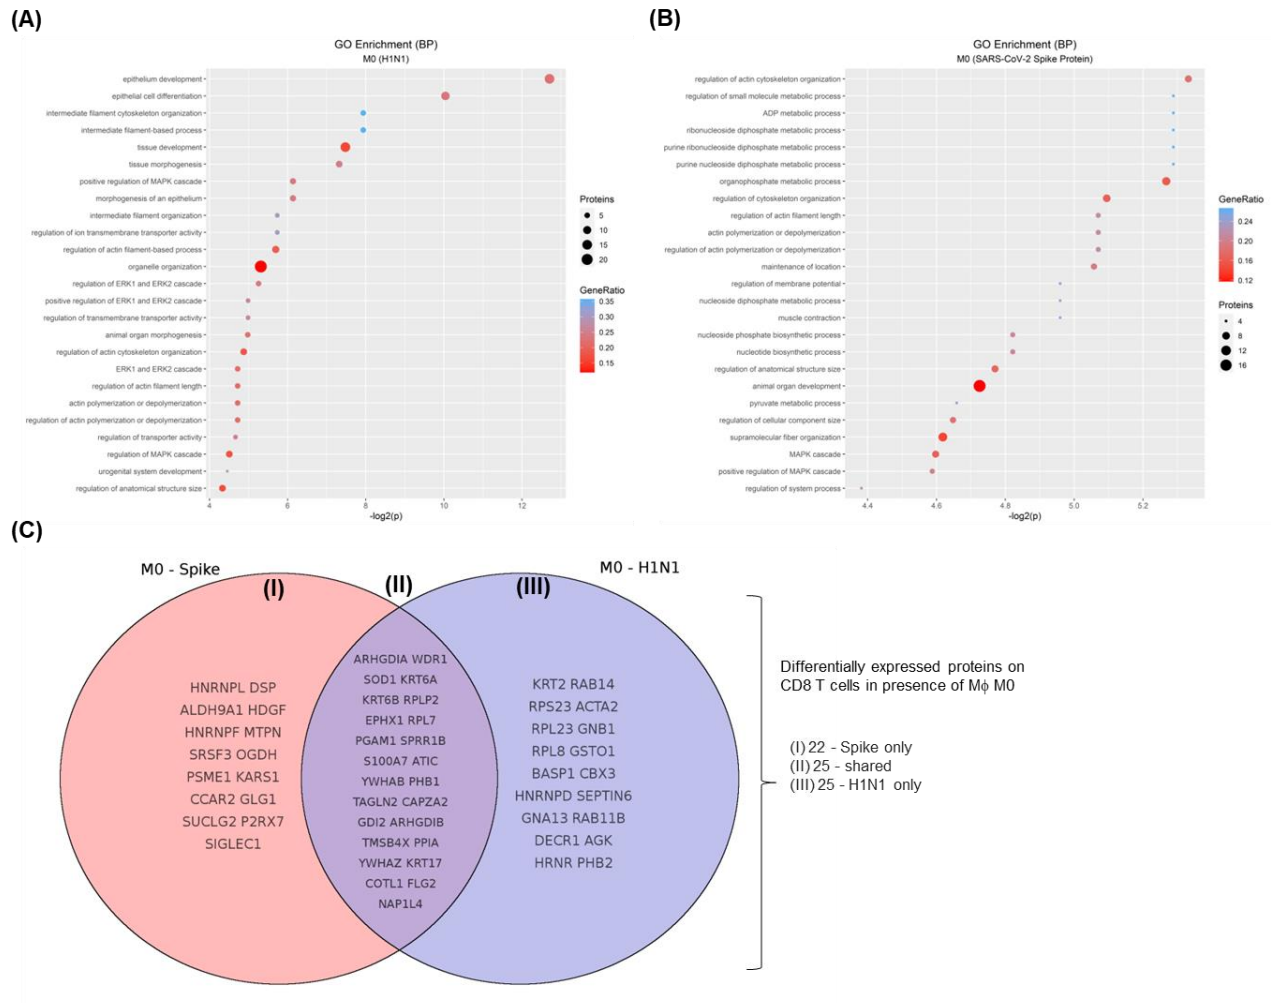

**Supplementary Figure S13.** Proteomics alterations-associated GO terms in CD8 T lymphocytes during SARS-CoV-2 infection identified using the TopGO package in R. CD8 T cells cocultured with macrophage subset, M0, stimulated in the presence of SARS-CoV-2 S protein or HA protein of H1N1. CD8 T cells in presence of stimulated M0 with (A) H1N1 shows the top 25 ontology terms- and (B) S protein shows the top 25 ontology terms significantly enriched with differentially expressed proteins using Gene Ontology (GO) biological process (BP) Enrichment. GO-based enrichment analysis of DEPs is arranged in terms of p-values of biological process ontologies (Fisher's exact test;  $p < 0.05$ ). (C) Comprehensive comparative protein analysis of CD8 T cells from in vitro cocultured with S protein stimulated Mφ M0 and with hemagglutinin/HA antigen protein from H1N1 stimulated Mφ M0. Venn diagram shows the shared proteins among differentially expressed proteins.

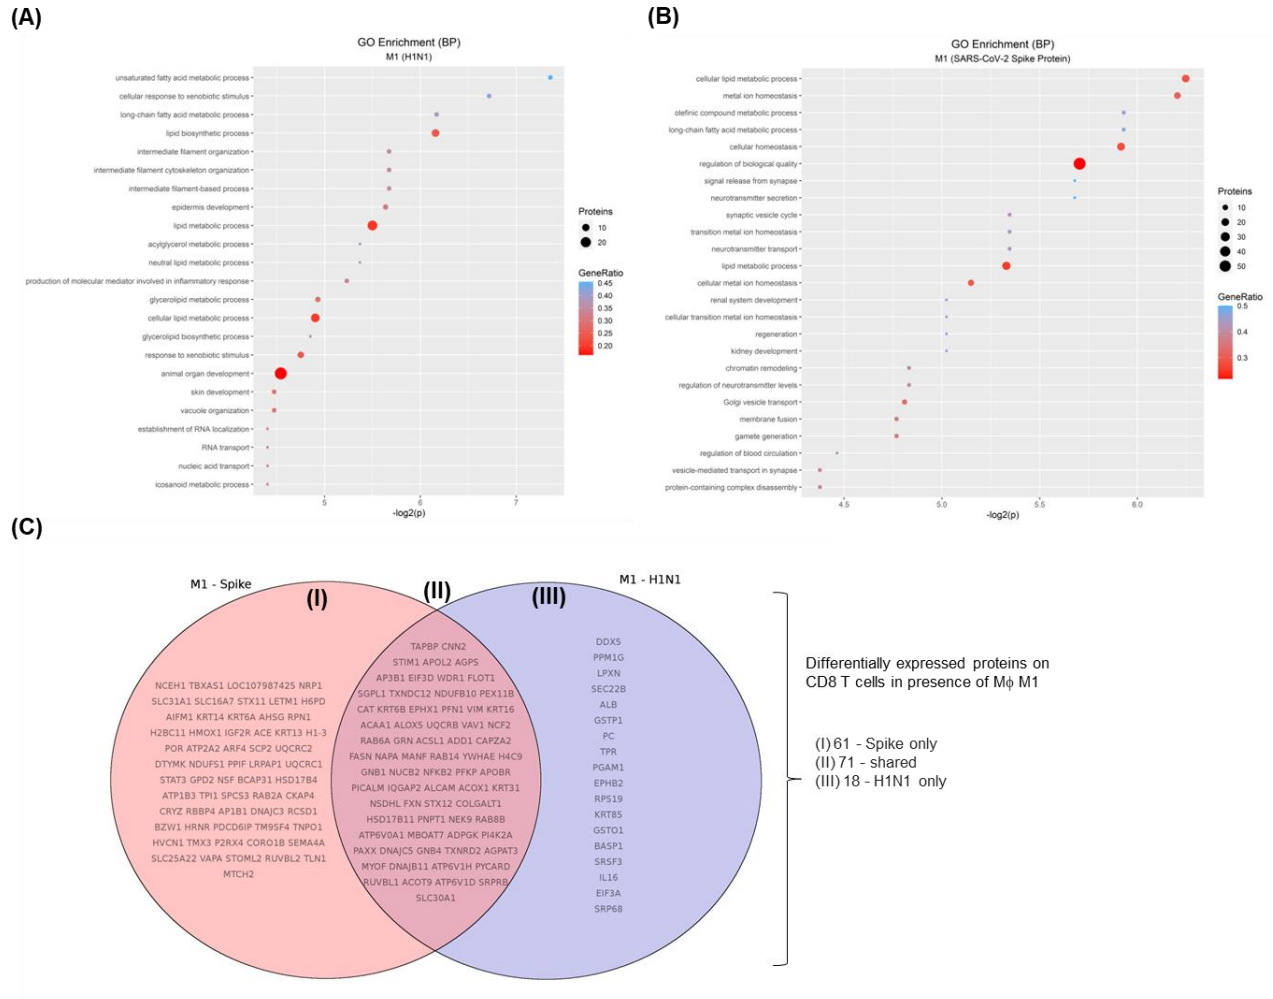

**Supplementary Figure S14.** Proteomics alterations-associated GO terms in CD8 T lymphocytes during SARS-CoV-2 infection identified using the TopGO package in R. CD8 T cells cocultured with macrophage subset, M1, stimulated in the presence of SARS-CoV-2 S protein or HA protein of H1N1. CD8 T cells in presence of stimulated M1 with (A) H1N1 shows the top 23 ontology terms- and (B) S protein shows the top 25 ontology terms significantly enriched with differentially expressed proteins using Gene Ontology (GO) biological process (BP) Enrichment. GO-based enrichment analysis of DEPs is arranged in terms of p-values of biological process ontologies (Fisher's exact test;  $p < 0.05$ ). (C) Comprehensive comparative protein analysis of CD8 T cells from in vitro cocultured with S protein stimulated Mφ M1 and with hemagglutinin/HA antigen protein from H1N1 stimulated Mφ M1. Venn diagram shows the shared proteins among differentially expressed proteins.

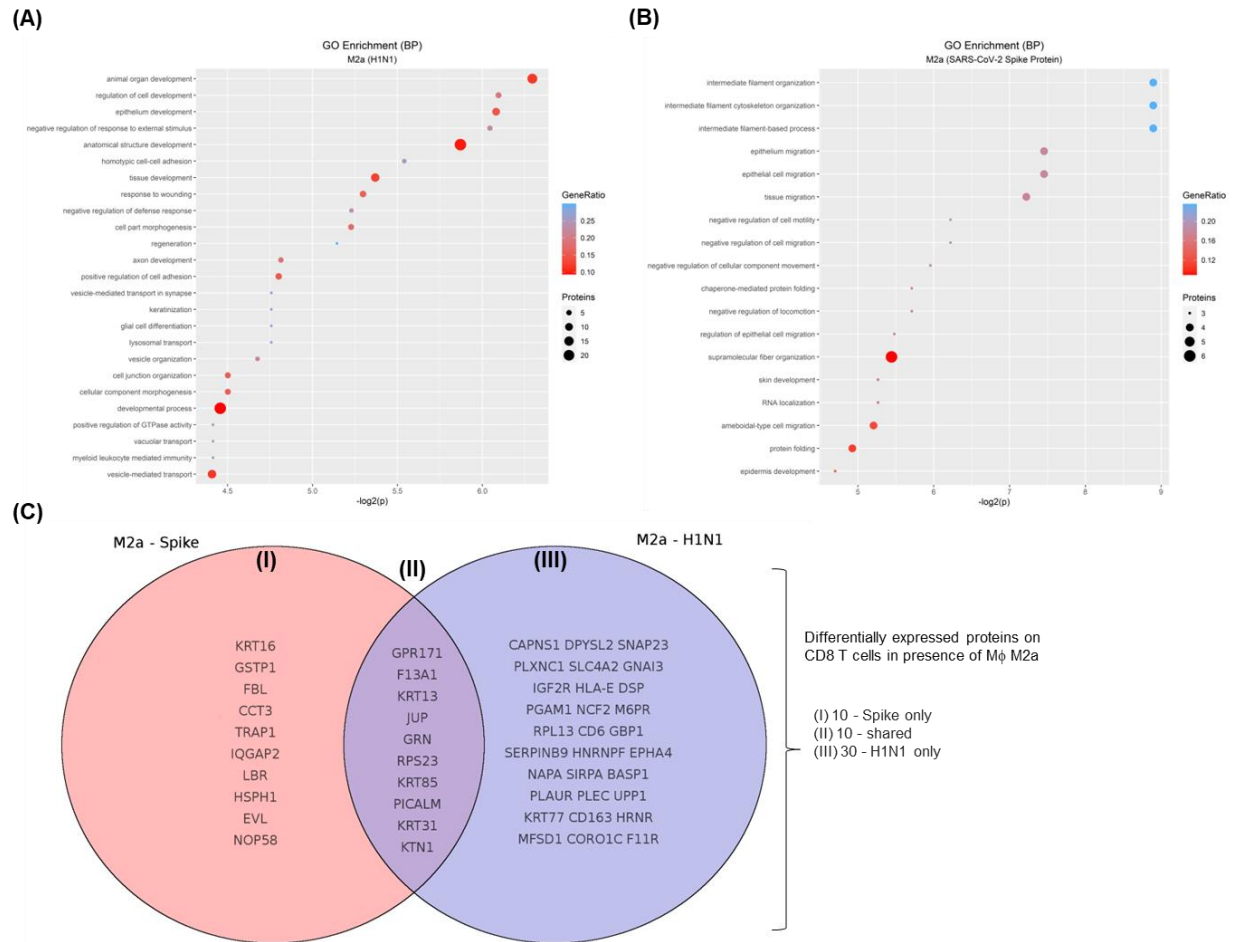

**Supplementary Figure S15.** Proteomics alterations-associated GO terms in CD8 T lymphocytes during SARS-CoV-2 infection identified using the TopGO package in R. CD8 T cells cocultured with macrophage subset, M2a, stimulated in the presence of SARS-CoV-2 S protein or HA protein of H1N1. CD8 T cells in presence of stimulated M2a with (A) H1N1 shows the top 23 ontology terms- and (B) S protein shows the top 18 ontology terms significantly enriched with differentially expressed proteins using Gene Ontology (GO) biological process (BP) Enrichment. GO-based enrichment analysis of DEPs is arranged in terms of p-values of biological process ontologies (Fisher's exact test;  $p < 0.05$ ). (C) Comprehensive comparative protein analysis of CD8 T cells from in vitro cocultured with S protein stimulated Mφ M2a and with hemagglutinin/HA antigen protein from H1N1 stimulated Mφ M2a. Venn diagram shows the shared proteins among differentially expressed proteins.



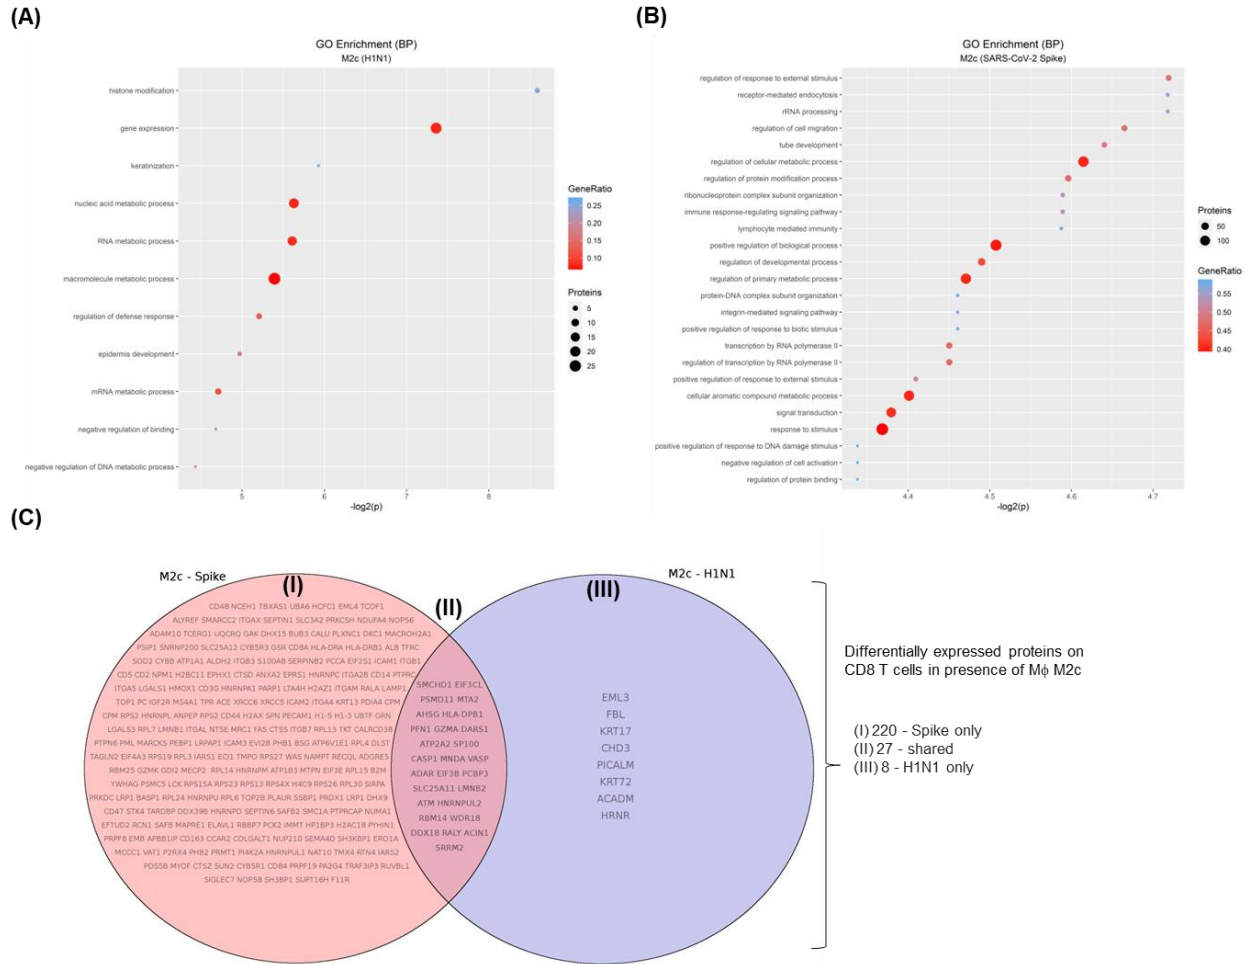

**Supplementary Figure S16.** Proteomics alterations-associated GO terms in CD8 T lymphocytes during SARS-CoV-2 infection identified using the TopGO package in R. CD8 T cells cocultured with macrophage subset, M2c, stimulated in the presence of SARS-CoV-2 S protein or HA protein of H1N1. CD8 T cells in presence of stimulated M2c with (A) H1N1 shows the top 11 ontology terms- and (B) S protein shows the top 25 ontology terms significantly enriched with differentially expressed proteins using Gene Ontology (GO) biological process (BP) Enrichment. GO-based enrichment analysis of DEPs is arranged in terms of p-values of biological process ontologies (Fisher's exact test;  $p < 0.05$ ). (C) Comprehensive comparative protein analysis of CD8 T cells from in vitro cocultured with S protein stimulated Mφ M2c and with hemagglutinin/HA antigen protein from H1N1 stimulated Mφ M2c. Venn diagram shows the shared proteins among differentially expressed proteins.
