# Supplementary material for: Macrophage-Induced Exacerbation of Nasopharyngeal Inflammatory Lymphocytes in COVID-19 Disease
Source: MDPI journal article supplement (doi:10.3390/covid3040041), 2023-04-13
Supplement: s1 [file s1 › Supplementary Tables_V3_041223_tri.pdf]

## Supplementary Tables

**Supplementary Table S1. Patient Demographic Information and the Average of Cytokine/chemokine Level per Category**

|                         | Positive Patient |                  | Negative Patient |                  |
|-------------------------|------------------|------------------|------------------|------------------|
|                         | Male             | Female           | Male             | Female           |
| Number                  | 44               |                  | 40               |                  |
| Gender                  | (22 M)           | (22 F)           | (24 M)           | (16 F)           |
| Age                     | 18 yr. to 68 yr. | 18 yr. to 57 yr. | 18 yr. to 76 yr. | 18 yr. to 81 yr. |
|                         | 15.11 ± 1.6 (N1) | 15.28 ± 1.8 (N1) |                  |                  |
| CT Value                | 15.99 ± 1.5 (N2) | 15.65 ± 2 (N2)   | -                | -                |
| <b><u>Cytokines</u></b> | (pg/mg)          | (pg/mg)          | (pg/mg)          | (pg/mg)          |
| PD-L1/B7-H1             | 85.95 ± 86.4     | 64.68 ± 39.4     | 52.61 ± 37.1     | 53.82 ± 32.6     |
| Eotaxin                 | 88.27 ± 112.4    | 129.04 ± 131.3   | 74.69 ± 97.7     | 76.38 ± 107.9    |
| MIP-3b                  | 213.11 ± 178.6   | 163.19 ± 159.5   | 71.46 ± 92.6     | 75.99 ± 64.9     |
| MCP-1                   | 222.84 ± 213.2   | 151.89 ± 222.9   | 34.5 ± 30.8      | 44.95 ± 45.1     |
| MIP-3a                  | 27.82 ± 25.1     | 20.16 ± 24.3     | 11.98 ± 11.6     | 14.87 ± 15.6     |
| MIP-1a                  | 60.02 ± 46.9     | 63.82 ± 46.7     | 37.68 ± 31.4     | 38.72 ± 35.4     |
| MIP-1b                  | 515.59 ± 314     | 524.99 ± 419.5   | 276.52 ± 348.1   | 274.44 ± 332.8   |
| CD40L                   | 1697.71 ± 1338.8 | 900.40 ± 818.2   | 1191.51 ± 1123.5 | 1190.27 ± 1048.8 |
| GROa                    | 3459.74 ± 2561.6 | 2785.26 ± 2325.6 | 2238.01 ± 3231.9 | 1860.21 ± 1470   |
| IP-10                   | 2562.61 ± 1712.4 | 1541.89 ± 1639.2 | 107.94 ± 179.3   | 266.07 ± 535.6   |
| GROb                    | 147.68 ± 116.8   | 190.72 ± 171.4   | 84.81 ± 105.4    | 72.2 ± 72.4      |
| IL-8                    | 958.21 ± 1050.2  | 684.91 ± 487.5   | 422.13 ± 580.5   | 436.58 ± 427.4   |
| EGF                     | 214.66 ± 170.7   | 228.01 ± 101.9   | 189.93 ± 117.5   | 226.29 ± 114     |
| Fit-3L                  | 87 ± 95.4        | 77.88 ± 72.4     | 59.08 ± 59.1     | 47.23 ± 39.6     |
| G-CSF                   | 295.08 ± 311.3   | 134.62 ± 152.4   | 91.87 ± 135.2    | 106.99 ± 183.8   |
| GM-CSF                  | 195.43 ± 77.5    | 151.52 ± 70.3    | 46.5 ± 40.2      | 59.38 ± 58.9     |
| Granzyme-B              | 1049.47 ± 1660.2 | 571.44 ± 978.7   | 75.04 ± 114.4    | 167.01 ± 398.9   |
| IFNa                    | 27.68 ± 30.4     | 7.58 ± 9.2       | 6.38 ± 4.9       | 4.98 ± 3.9       |
| IFN beta                | 13.76 ± 16.42    | 19.84 ± 23.1     | 12.16 ± 17.3     | 12.45 ± 16.2     |
| IFNg                    | 29.81 ± 25.7     | 20.85 ± 23.9     | 18.2 ± 15.2      | 19.61 ± 19.7     |
| IL-10                   | 506.45 ± 272     | 356.29 ± 142.3   | 169.76 ± 245.7   | 210.21 ± 234.1   |
| IL-12p70                | 31.11 ± 30.9     | 42.82 ± 36.3     | 33.67 ± 24.3     | 27.87 ± 16.4     |
| IL-13                   | 94.21 ± 119.6    | 113 ± 99         | 77.28 ± 99.8     | 77.52 ± 84.4     |
| IL-15                   | 6.52 ± 5.3       | 7.51 ± 6.2       | 5.58 ± 5.3       | 5.21 ± 4.8       |
| IL-17A                  | 9.62 ± 13.8      | 17.18 ± 18       | 9.31 ± 13.5      | 9.92 ± 14.9      |
| IL-17E                  | 23.49 ± 43.5     | 11.71 ± 9.2      | 33.71 ± 48.2     | 27.94 ± 38.4     |
| IL-1b                   | 145.55 ± 174.2   | 102.03 ± 143.8   | 10.74 ± 9.3      | 28.24 ± 50.4     |
|                         | 18924.66 ±       | 17150.52 ±       | 13309.91 ±       | 12228.29 ±       |
| IL-1ra                  | 10155.2          | 16162.6          | 13970.8          | 8976.3           |
| IL-2                    | 12.14 ± 11.2     | 12.67 ± 9.2      | 7.73 ± 7.6       | 7 ± 7            |

|            |                  |                  |                |                |
|------------|------------------|------------------|----------------|----------------|
| IL-3       | 26.79 ± 22.1     | 27.77 ± 23.3     | 31.61 ± 20.5   | 28.95 ± 23.1   |
| IL-33      | 204.08 ± 212.8   | 206.71 ± 278.3   | 151.74 ± 282   | 122.43 ± 148.9 |
| IL-4       | 3.92 ± 4.2       | 4.94 ± 4.3       | 3.75 ± 5.1     | 3.85 ± 3.7     |
| IL-5       | 8.21 ± 9.8       | 11.75 ± 13.2     | 8.02 ± 11.4    | 5.57 ± 5.7     |
| IL-6       | 255.23 ± 379.3   | 124.8 ± 218.7    | 25.42 ± 29.8   | 60.65 ± 109.3  |
| IL-7       | 13.77 ± 11.6     | 10.61 ± 6.8      | 7.96 ± 8.8     | 9.81 ± 9.2     |
| PDGF-AA    | 129.16 ± 178.1   | 112.13 ± 93.3    | 101.57 ± 103   | 120.84 ± 136.5 |
| PDGF-AB/BB | 6.23 ± 6.4       | 3.05 ± 3.2       | 9.46 ± 11.4    | 6.83 ± 3.7     |
| RANTES     | 261.91 ± 86.6    | 257.35 ± 76.1    | 320.21 ± 85    | 312.77 ± 42.9  |
| TGFa       | 30.62 ± 45       | 20.41 ± 24.3     | 27.58 ± 38.6   | 20.38 ± 19.2   |
| TNFa       | 22.95 ± 19.5     | 7.61 ± 13.75     | 10.19 ± 9      | 9.12 ± 11.7    |
| TRAIL      | 5439.23 ± 5407.6 | 3133.11 ± 3682.6 | 451.67 ± 416.9 | 657.86 ± 503.9 |
| VEGF       | 217.74 ± 155.3   | 247.56 ± 105.1   | 197.24 ± 161.3 | 198.95 ± 118.4 |
| FGF basic  | 29.68 ± 34.6     | 12.93 ± 17.6     | 20.99 ± 34.4   | 12.91 ± 10.8   |
| IL-1a      | 37.84 ± 41.3     | 23.21 ± 24.8     | 20.57 ± 25.4   | 22.47 ± 41.7   |

**Supplementary Table S2. (Patient demographics belonging to Figure 3A)**

|          | Positive Patients |                  | Negative Patients |              |
|----------|-------------------|------------------|-------------------|--------------|
| Number   | 64                |                  | 74                |              |
| Gender   | 29 M              | 35 F             | 32 M              | 42 F         |
| Age      | 18 to 72 yr.      | 18 to 94 yr.     | 18 to 67 yr.      | 18 to 72 yr. |
| CT Value | 19.72 ± 4 (N1)    | 20.08 ± 5.1 (N1) | -                 | -            |
|          | 21.25 ± 4.9 (N2)  | 21.59 ± 5.9 (N2) |                   |              |

**Supplementary Table S3. (Patient demographics belonging to Figure 3B and 3C)**

|          | Positive Patients |                  | Negative Patients |                  |
|----------|-------------------|------------------|-------------------|------------------|
| Number   | 140               |                  | 148               |                  |
| Gender   | 65 M              | 75 F             | 53 M              | 95 F             |
| Age      | 18 yr. to 78 yr.  | 18 yr. to 67 yr. | 18 yr. to 75 yr.  | 18 yr. to 81 yr. |
| CT Value | 20.52 ± 5.6 (N1)  | 21.64 ± 5.4 (N1) | -                 | -                |
|          | 22.28 ± 6.6 (N2)  | 23.5 ± 6.2 (N2)  |                   |                  |

**Supplementary Table S4. (Patient demographics belonging to Figure 4A)**

|          | Positive Patients    |                      | Negative Patients |                  |
|----------|----------------------|----------------------|-------------------|------------------|
| Number   | 108                  |                      | 109               |                  |
| Gender   | 51 M                 | 57 F                 | 58 M              | 51 F             |
| Age      | 18 yr. to 79 yr.     | 18 yr. to 64 yr.     | 18 yr. to 79 yr.  | 18 yr. to 74 yr. |
| CT Value | 19.91 $\pm$ 5.3 (N1) | 21.38 $\pm$ 5.4 (N1) | -                 | -                |
|          | 21.42 $\pm$ 6.1(N2)  | 22.76 $\pm$ 5.9 (N2) |                   |                  |

**Supplementary Table S5. (Patient demographics belonging to Figure 4B)**

|          | Positive Patients    |                      | Negative Patients |                  |
|----------|----------------------|----------------------|-------------------|------------------|
| Number   | 105                  |                      | 112               |                  |
| Gender   | 54 M                 | 70 F                 | 56 M              | 56 F             |
| Age      | 18 yr. to 77 yr.     | 18 yr. to 74 yr.     | 18 yr. to 82 yr.  | 18 yr. to 71 yr. |
| CT Value | 21.03 $\pm$ 5.2 (N1) | 20.54 $\pm$ 4.9 (N1) | -                 | -                |
|          | 22.86 $\pm$ 5.9(N2)  | 21.78 $\pm$ 6.2 (N2) |                   |                  |

**Supplementary Table S6. (Patient demographics belonging to Figure 4E)**

|          | Positive Patients    |                      | Negative Patients |                  |
|----------|----------------------|----------------------|-------------------|------------------|
| Number   | 45                   |                      | 47                |                  |
| Gender   | 17 M                 | 28 F                 | 23 M              | 24 F             |
| Age      | 18 yr. to 65 yr.     | 18 yr. to 64 yr.     | 18 yr. to 76 yr.  | 18 yr. to 74 yr. |
| CT Value | 18.97 $\pm$ 4.8 (N1) | 19.93 $\pm$ 4.4 (N1) | -                 | -                |
|          | 20.35 $\pm$ 5.3 (N2) | 21.59 $\pm$ 5.4 (N2) |                   |                  |

**Supplementary Table S7. (Patient demographics belonging to Figure 5 that were stained with cell surface markers (CD5, CCR7, Ki-67 and OX40))**

|          |  | Positive Patients    |                      | Negative Patients |                  |
|----------|--|----------------------|----------------------|-------------------|------------------|
| Number   |  | 38                   |                      | 45                |                  |
| Gender   |  | 16 M                 | 22 F                 | 20 M              | 25 F             |
| Age      |  | 18 yr. to 48 yr.     | 18 yr. to 89 yr.     | 18 yr. to 67 yr.  | 18 yr. to 90 yr. |
| CT Value |  | 23.55 $\pm$ 4.6 (N1) | 19.84 $\pm$ 4.2 (N1) | -                 | -                |
|          |  | 25.34 $\pm$ 5.1 (N2) | 21.44 $\pm$ 4.8 (N2) | -                 | -                |

**Supplementary Table S8. (Patient demographics belong to Figure 5 that were stained with cell surface markers (CD130, CD40, and CD69))**

|          |  | Positive Patients   |                      | Negative Patients |                  |
|----------|--|---------------------|----------------------|-------------------|------------------|
| Number   |  | 32                  |                      | 33                |                  |
| Gender   |  | 15 M                | 17 F                 | 15 M              | 18 F             |
| Age      |  | 18 yr. to 60 yr.    | 18 yr. to 64 yr.     | 18 yr. to 77 yr.  | 18 yr. to 81 yr. |
| CT Value |  | 21.6 $\pm$ 4.4 (N1) | 24.39 $\pm$ 4.9 (N1) | -                 | -                |
|          |  | 22.63 $\pm$ 5 (N2)  | 26.59 $\pm$ 6.3 (N2) | -                 | -                |

**Supplementary Table S9. (Patient demographics belong to Figure 5 that were stained with cell surface markers (CD28 and CD130))**

|          |  | Positive Patients    |                     | Negative Patients |                  |
|----------|--|----------------------|---------------------|-------------------|------------------|
| Number   |  | 46                   |                     | 55                |                  |
| Gender   |  | 24 M                 | 22 F                | 28 M              | 27 F             |
| Age      |  | 18yr. to 69 yr.      | 18 yr. to 59 yr.    | 18 yr. to 70 yr.  | 18 yr. to 59 yr. |
| CT Value |  | 21.8 $\pm$ 4.8 (N1)  | 21.5 $\pm$ 4.2 (N1) | -                 | -                |
|          |  | 23.67 $\pm$ 5.8 (N2) | 23.34 $\pm$ 5 (N2)  | -                 | -                |

**Supplementary Table S10. (Patient demographics belonging to Figures 7A and B)**

|          | Positive Patients |                | Negative Patients |                 |
|----------|-------------------|----------------|-------------------|-----------------|
| Number   | 705               |                | 1018              |                 |
| Gender   | 324 M             | 381 F          | 480 M             | 538 F           |
| Age      | 18 to 83 yr.      | 18 to 76 yr.   | 1 mo. to 94 yr.   | 2 mo. to 85 yr. |
| CT Value | 19.69 ± 4 (N1)    | 19.8 ± 4 (N1)  |                   |                 |
|          | 21.15 ± 5 (N2)    | 21.27 ± 5 (N2) | -                 | -               |

**Supplementary Table S11. Materials used in the study.**

| REAGENT/RESOURCE                                  | SOURCE          | IDENTIFIER |                                             |
|---------------------------------------------------|-----------------|------------|---------------------------------------------|
| <b>List of Flow cytometry antibodies/reagents</b> |                 |            |                                             |
| <b>Antibodies used in study belong to figure</b>  |                 |            | <b>Abs amount<br/>in 50µL<br/>DPBS/well</b> |
| <b>Figure 2A</b>                                  |                 |            |                                             |
| Anti-human CD3 FITC, Clone: OKT3                  | BioLegend       | 317306     | 0.6 µg                                      |
| Anti-human CD4 PerCP/Cyanine 5.5, Clone: RPA-T4   | BioLegend       | 300530     | 0.3 µg                                      |
| Anti-human CD8a APC/Cyanine7, Clone: RPA-T8       | BioLegend       | 301016     | 0.6 µg                                      |
| Anti-human CD20 APC, Clone: 2H7                   | BioLegend       | 302310     | 0.15 µg                                     |
| Anti-human CD45 Brilliant Violet 510, Clone: 2D1  | BioLegend       | 368526     | 0.15 µg                                     |
| Anti-human CD56 (NCAM) PE-Cyanine7, Clone: CMSSB  | Invitrogen      | 25-0567-42 | 0.075 µg                                    |
| Fixable Viability Dye eFluor™ 450                 | Invitrogen      | 65-0863-14 | 1:1000                                      |
| <b>Figure 2B and C</b>                            |                 |            |                                             |
| Anti-human CD4 APC-Alexa Fluor 700, Clone:13B8.2  | Beckman Coulter | B10824     | 2 µL                                        |
| Anti-human CD8a PE/Cyanine7, Clone: RPA-T8        | BioLegend       | 301012     | 0.4 µg                                      |
| Anti-human CD45 Brilliant Violet 510, Clone: 2D1  | BioLegend       | 368526     | 0.1 µg                                      |
| Anti-human IL-10 APC, Clone: JES3-19F1            | BioLegend       | 506807     | 0.04 µg                                     |

|                                                                    |                   |                       |          |
|--------------------------------------------------------------------|-------------------|-----------------------|----------|
| Anti-human IL-6 PerCP-eFluor 710, Clone: MQ2-13A5                  | Invitrogen        | 46-7069-42            | 0.05 µg  |
| Anti-human IL-2 FITC, Clone: IL2.39.1                              | Beckman Coulter   | B90436                | 2 µL     |
| Anti-human TNF-α PE, Clone: MAb11                                  | BioLegend         | 502909                | 0.2 µg   |
| Anti-human IFN-γ FITC, Clone: 45.15                                | Beckman Coulter   | IM2716U               | 2 µL     |
| Anti-human IFN-γ Alexa Fluor 700, Clone: 4S.B3                     | BioLegend         | 502520                | 1 µg     |
| Mouse Anti-Human TGF-β1 PE-CF594, Clone: TW4-9E7                   | BD Horizon        | 562422                | 0.4 µg   |
| Fixable Viability Dye eFluor™ 450                                  | Invitrogen        | 65-0863-14            | 1:1000   |
| <b>Antibodies used in study belong to figure 3</b>                 |                   |                       |          |
| <b>Figure 3A</b>                                                   |                   |                       |          |
| Anti-human CD3 FITC, Clone: OKT3                                   | BioLegend         | 317306                | 0.2 µg   |
| Anti-human CD4 APC-Cyanine7, Clone: RPA-T4                         | TONBO Biosciences | 25-0049-T100          | 0.1 µg   |
| Anti-human CD8a PE/Cyanine7, Clone: RPA-T8                         | BioLegend         | 301012                | 0.2 µg   |
| Anti-human CD45 Brilliant Violet 510, Clone: 2D1                   | BioLegend         | 368526                | 0.05 µg  |
| Anti-human CCR10 APC, Clone: 6588-5                                | BioLegend         | 341506                | 1 µL     |
| Anti-human CD183 (CXCR3) PE, Clone: G025H7                         | BioLegend         | 353706                | 1 µL     |
| Anti-human CD194 (CCR4) PerCP/Cyanine 5.5, Clone: L291H4           | BioLegend         | 359406                | 1 µL     |
| Anti-human CD196 (CCR6) Alexa Fluoro 700 anti-human, Clone: G034E3 | BioLegend         | 353434                | 1 µL     |
| Fixable Viability Dye eFluor™ 450                                  | Invitrogen        | 65-0863-14            | 1:1000   |
| <b>Figure 3B</b>                                                   |                   |                       |          |
| Anti-human CD3 BV510, Clone HIT3a                                  | BD Biosciences    | 564713                | 0.05 µg  |
| Anti-human CD152 (CTLA-4) APC, Clone BNI3                          | BioLegend         | 369612                | 1 µL     |
| Anti-human CD25 Alexa Fluor 700, Clone M-A251                      | BioLegend         | 356118                | 1 µL     |
| Anti-human CD4 APC/Cyanine7, Clone SK3                             | BioLegend         | 344616                | 0.012 µg |
| Anti-human CD127 BB700 Mouse anti-human, Clone HIL-7R-M21          | BD Biosciences    | 566398<br>Lot 2272891 | 0.2 µg   |

|                                                               |                 |                       |          |
|---------------------------------------------------------------|-----------------|-----------------------|----------|
| Anti-human FOXP3 Recombinant PE, Clone QA18A03                | BioLegend       | 364704                | 2.5 µL   |
| Fixable Viability Dye eFluor™ 450                             | Invitrogen      | 65-0863-14            | 1:1000   |
| <b>Figure 3C</b>                                              |                 |                       |          |
| Anti-human CD3 Brilliant Violet 510, Clone: HIT3a             | BD Biosciences  | 564713<br>Lot 2265049 | 0.15 µg  |
| Anti-human CD8a PE/Cyanine7, Clone: RPA-T8                    | BioLegend       | 301012                | 3 µL     |
| Anti-human CD45RO PE-CF594, Clone: UCHL1                      | BD Biosciences  | 562299<br>Lot 1333677 | 0.6 µg   |
| Anti-human IL-17A APC/Cyanine7, Clone: BL168                  | BioLegend       | 512320                | 0.06 µg  |
| Anti-human IFNγ Alexa Fluor 700, eBiosciences, Clone: 4S.B3   | Invitrogen      | 56-7319-42            | 0.15 µg  |
| Anti-human IL-4 Alexa Fluor 488, Clone: 8D4-8                 | BD Biosciences  | 557990                | 0.6 µg   |
| Anti-human IL-10 APC, Clone: JES3-19F1                        | BioLegend       | 506807                | 0.06 µg  |
| Anti-human IL-21PerCP/Cyanine 5.5, Clone: 3A3-N2              | BioLegend       | 513012                | 0.15 µg  |
| Fixable Viability Dye eFluor™ 450                             | Invitrogen      | 65-0863-14            | 1:1000   |
| <b>Figure 4</b>                                               |                 |                       |          |
| Anti-human CD3 FITC, Clone: OKT3                              | BioLegend       | 317306                | 0.2 µg   |
| Anti-human CD3 PC7, Clone: UCHT1                              | Beckman Coulter | 6607100               | 1 µL     |
| Anti-human CD4 PerCP/Cyanine 5.5, Clone: RPA-T4               | BioLegend       | 300530                | 0.1 µg   |
| Anti-human CD5 PC7, Clone: BL1a                               | Beckman Coulter | A51075                | 1 µL     |
| Anti-human CD10 APC, Clone: ALB1                              | Beckman Coulter | IM3633                | 1 µL     |
| Anti-human CD28 APC/Cyanine7, Clone: CD28.2                   | BioLegend       | 302966                | 0.1 µg   |
| Anti-human CD31 (PECAM-1) APC-eFluor 780, Clone: WM-59 (WM59) | Invitrogen      | 47-0319-42            | 0.025 µg |
| Anti-human CD45 Krome Orange, Clone: J33                      | Beckman Coulter | A96416                | 1 µL     |
| Anti-human CD69 APC-R700, Clone: FN50                         | BD BioSciences  | 565154<br>Lot 2294006 | 0.1 µg   |
| Anti-human CD116 PE, Clone: SCO6                              | Beckman Coulter | IM1977                | 1 µL     |

|                                                                                                 |                 |            |            |
|-------------------------------------------------------------------------------------------------|-----------------|------------|------------|
| Anti-human CD130 PE, Clone: AM64                                                                | BD BioSciences  | 555757     | 0.025 µg   |
| Anti-human CD 134 (OX40) Brilliant Violet 510, Clone: Ber-ACT35 (ACT35)                         | BioLegend       | 350026     | 0.2 µg     |
| Anti-human CD137 (4-1BB) Alexa Fluor 700, Clone: 4B4 (4B4-1)                                    | Invitrogen      | 56-1379-42 | 0.05 µg    |
| Anti-human CD154 (CD 40 Ligand), APC, Clone: 24-31                                              | Invitrogen      | 17-1548-42 | 0.05 µg    |
| Anti-human CD197 (CCR7) APC, Clone: G043H7                                                      | BioLegend       | 353214     | 0.2 µg     |
| Anti-human anti-Ki-67 Alexa Fluor 700, Clone: B56                                               | BD BioSciences  | 561277     | 0.15 µg    |
| Anti-human Human (target species) Kappa Chain FITC, Clone: Polyclonal, F(ab') <sub>2</sub> Goat | Beckman Coulter | C15623     | 1 µL       |
| Anti-human Lambda Chain PE, Clone: Polyclonal, F(ab') <sub>2</sub> Goat                         | Beckman Coulter | C15189     | 1 µL       |
| Anti-human Myeloperoxidase (MPO) FITC, Clone: MPO455-8E6                                        | Invitrogen      | 11-1299-41 | 0.1 µg     |
| Fixable Viability Dye eFluor™ 450                                                               | Invitrogen      | 65-0863-14 | 1:1000     |
| <b>Figure 5</b>                                                                                 |                 |            |            |
| Anti-human CD11c FITC, Clone: Bu15                                                              | Biolegend       | 337214     | 0.1 µg     |
| Anti-human CD11b APC, Clone: ICRF44                                                             | BD bioscience   | 550019     | 0.00625µg  |
| Anti-human CD14 Alexa Fluor® 700, Clone: M5E2                                                   | BD Bioscience   | 557923     | 0.05 µg    |
| Anti-human CD16 APC-Cy™7, Clone: 3G8                                                            | BD Bioscience   | 557758     | 0.05 µg    |
| Anti-human CD38 Alexa Fluor® 700, Clone: HIT2                                                   | Biolegend       | 303524     | 0.125 µg   |
| Anti-human CD40 PE/Cyanine7, Clone: 5C3                                                         | Biolegend       | 334322     | 0.0125 µg  |
| Anti-human CD68 APC, Clone: Y1/82A                                                              | Biolegend       | 333810     | 0.00625 µg |
| Anti-human CD80 Brilliant Violet 510™, Clone: 2D10                                              | Biolegend       | 305233     | 0.04 µg    |
| Anti-human CD86 PE, Clone: BU63                                                                 | Biolegend       | 374206     | 0.0125 µg  |
| Anti-human CD163 PerCP, Clone: GHI/61                                                           | Biolegend       | 333626     | 0.1 µg     |
| Anti-human CD206 PE-CF594, Clone: 19.2                                                          | BD Bioscience   | 564063     | 0.05 µg    |
| Anti-human CD252 (OX40L) PE, Clone: 11C3.1                                                      | Biolegend       | 326308     | 0.1 µg     |

|                                                                |                                  |                        |                       |
|----------------------------------------------------------------|----------------------------------|------------------------|-----------------------|
| Anti-human CD274 (B7-H1, PD-L1) PE/Dazzle™ 594, Clone: 29E.2A3 | Biolegend                        | 329732                 | 0.05 µg               |
| Anti-human MARCO PE-Cyanine7, Clone: PLK-1                     | Invitrogen                       | 25-5447-42             | 0.003 µg              |
| Fixable Viability Dye eFluor™ 450                              | Invitrogen                       | 65-0863-14             | 1:1000                |
|                                                                |                                  |                        |                       |
| <b>Other reagents used for Flow Cytometry</b>                  |                                  |                        |                       |
| Fc Receptor Binding Inhibitor Antibody                         | Invitrogen                       | 14-9161-73             | 0.5µg                 |
| Cell staining buffer                                           | BioLegend,                       | B330711                |                       |
| FluroFix™ Buffer                                               | BioLegend                        | B331501                |                       |
| Human TruStain FcXTM (Fc receptor blocking solution)           | BioLegend                        | 422302                 | 2µL/50uL DPBS/well    |
| Intracellular Staining Permeabilization Wash Buffer (10X)      | BioLegend                        | 421002                 |                       |
| eBioscience FOXP3/transcription factor Staining buffer set     | Invitrogen                       | 00-5523-00             |                       |
| Fixation/Permeabilization concentrate                          | Invitrogen                       | 00-5123-43             |                       |
| eBiosciences Fixation/Perm diluent                             | Invitrogen                       | 00-5223-56             |                       |
| Permeabilization Buffer (perm wash)                            | Invitrogen                       | 00-8333-56             |                       |
| <b>Biological Samples</b>                                      |                                  |                        |                       |
| Human nasopharyngeal swabs                                     | Ayass Bioscience LLC             | IRB# ABS001_01_01_2022 |                       |
| Buffy coat                                                     | Carter Blood Care, Bedford Texas |                        |                       |
| <b>Other Requirements</b>                                      |                                  |                        |                       |
| Recombinant Human M-CSF (carrier-free)                         | BioLegend                        | 574804                 | 50ngmL <sup>-1</sup>  |
| Lipopolysaccharides (LPS) from Escherichia coli O26:B6         | Millipore Sigma                  | L2654-1MG              | 100ngmL <sup>-1</sup> |
| Recombinant human IFN-gamma protein                            | R&D System                       | 285-IF-100/CF          | 100ngmL <sup>-1</sup> |
| Recombinant human IL-4 protein                                 | R&D System                       | 204-IL-020/CF          | 50ngmL <sup>-1</sup>  |
| Recombinant human IL-10 (aa 19-178)                            | R&D System                       | 1064-IL-               | 50ngmL <sup>-1</sup>  |

|                                                                                          |                         |                |                                                 |
|------------------------------------------------------------------------------------------|-------------------------|----------------|-------------------------------------------------|
|                                                                                          |                         | 025/CF         |                                                 |
| SARS-CoV-2 S-protein (Wild type)                                                         | ACROBiosystems          | SPN-C52H9      | 5nM                                             |
| SARS-CoV-2 S-protein (Omicron)                                                           | ACROBiosystems          | SPN-C52Hz      | 5nM                                             |
| SARS-CoV-2 S-protein (Delta)                                                             | ACROBiosystems          | SPN-C52He      | 5nM                                             |
| SARS-CoV-2 S-protein (Lamda)                                                             | ACROBiosystems          | SPN-C52Hs      | 5nM                                             |
| SARS-CoV-2 S-protein (Alpha)                                                             | ACROBiosystems          | SPN-C52H6      | 5nM                                             |
| SARS-CoV-2 S-protein (Delta+)                                                            | ACROBiosystems          | SPN-C52Ht      | 5nM                                             |
| Influenza A H1N1 (A/Brevig Mission/1/1918) Hemagglutinin Protein (HA1 Subunit) (His Tag) | 11068-V08H1             | SinoBiological | 5nM                                             |
| H3N2 (Influenza A H3N2 (A/Texas/1/1977) Hemagglutinin / HA1 Protein (His Tag)            | 40477-V08H1             | SinoBiological | 5nM                                             |
| RPMI                                                                                     | Gibco                   | 11875-093      |                                                 |
| HyClone Standard FBS, US Origin, 500 mL, Heat-inactivated                                | Cytiva life Sciences    | SH30088.03HI   | 10%                                             |
| HEPES                                                                                    | Cytiva life Sciences    | SH30851.01     | 25mM                                            |
| Sodium Pyruvate (100 mM)                                                                 | Gibco                   | 11360-070      | 1mM                                             |
| MEM Non-Essential Amino Acids Solution (100X)                                            | Gibco                   | 11140-050      | 1X                                              |
| Penicillin-Streptomycin<br>10,000 U/mL – Penicillin +<br>10,000 µg/mL Streptomycin       | Gibco                   | 15140-122      | 100U/mL Penicillin<br><br>100µg/mL Streptomycin |
| StemPro™ Accutase™ Cell Dissociation Reagent                                             | Gibco                   | A1110501       |                                                 |
| Ficoll-Paque PLUS density gradient media                                                 | Cytiva life Sciences    | 17144002       |                                                 |
| EasySep™ Human T Cell Enrichment Kit                                                     | StemCell                | 19051          |                                                 |
| EasySep™ Human CD8+ T Cell Enrichment Kit                                                | StemCell                | 19053          |                                                 |
| CellTrace™ CFSE Cell Proliferation Kit                                                   | Invitrogen              | C34554         |                                                 |
| Pierce™ Cell Surface Biotinylation and Isolation Kit                                     | ThermoFisher Scientific | A44390         |                                                 |
| EasyPep™ Mini MS Sample Prep Kit                                                         | ThermoFisher Scientific | A40006         |                                                 |

|                                                            |                         |                                                                                                                       |  |
|------------------------------------------------------------|-------------------------|-----------------------------------------------------------------------------------------------------------------------|--|
| Human XL Cytokine 44-plex Fixed Panel                      | R&D Systems             | LKTM014                                                                                                               |  |
|                                                            |                         |                                                                                                                       |  |
| <b>Software</b>                                            |                         |                                                                                                                       |  |
| Prism 9                                                    | GraphPad Software       | <a href="https://www.graphpad.com/scientific-software/prism/">https://www.graphpad.com/scientific-software/prism/</a> |  |
| FlowJo™ v10.8.1                                            |                         | <a href="https://www.flowjo.com/">https://www.flowjo.com/</a>                                                         |  |
| <b>SARS-CoV-2 RT PCR Assay Reagents</b>                    |                         |                                                                                                                       |  |
| RNAdvance Viral Kit                                        | Beckman Coulter         | A35604                                                                                                                |  |
| 2019-nCoV RUO Kit, 500 rxn                                 | IDT                     | 10006713                                                                                                              |  |
| 2019-nCoV_N_Positive Control                               | IDT                     | 268335814                                                                                                             |  |
| s_RPP30 Positive Control                                   | IDT                     | 268335815                                                                                                             |  |
| TaqPath™ 1-Step RT-qPCR Master Mix (4x)                    | ThermoFisher Scientific | A15299                                                                                                                |  |
| Biomek i5                                                  | Beckman Coulter         | B87583                                                                                                                |  |
| StepOnePlus™ Real-Time PCR System                          | ThermoFisher Scientific | 4376600                                                                                                               |  |
|                                                            |                         |                                                                                                                       |  |
| <b>Instruments</b>                                         |                         |                                                                                                                       |  |
| Navios EX System, 10 colors/3 lasers (5+3+2 configuration) | Beckman Coulter         | B83535                                                                                                                |  |
| FLEXMAP-3D                                                 | Luminex Corporation     | FM3DD21267021                                                                                                         |  |

**Supplementary Table S12. The lists of abbreviation**

| <b>Abbreviation</b> | <b>Name</b>                                                  |
|---------------------|--------------------------------------------------------------|
| COVID-19            | Coronavirus disease 20189                                    |
| NP                  | nasopharyngeal                                               |
| UA                  | upper airway                                                 |
| MΦ                  | macrophage                                                   |
| RT-qPCR             | Reverse transcription-quantitative polymerase chain reaction |
| ELISA               | Enzyme-linked immunosorbent assay                            |
| LC-MS               | Liquid chromatography–mass spectrometry                      |
| hPBMCs              | human peripheral blood mononuclear                           |
| PRRs                | pattern recognition receptors                                |
| pDCs                | plasmacytoid dendritic cells                                 |
| RIG-1               | retinoic acid-inducible gene I                               |
| RLRs                | retinoic acid-inducible gene I (RIG-1)-like receptors        |
| NF-KB               | nuclear factor kB                                            |
| DCs                 | dendritic cells                                              |
| NALT                | nasopharynx-associated lymphoid tissue                       |
| VTM                 | viral transport media                                        |
| ct                  | cycle threshold                                              |
| ICS                 | intracellular staining                                       |
| SS                  | surface staining                                             |
| CPRMI               | complete RPMI-1640                                           |
| FBS                 | fetal bovine serum                                           |
| RSV                 | respiratory syncytial virus                                  |
| ACE2                | angiotensin-converting enzyme 2                              |
| RT                  | room temperature                                             |

|                |                                                  |
|----------------|--------------------------------------------------|
| LPS            | lipopolysaccharides                              |
| EGF            | epidermal growth factor                          |
| TNF- $\alpha$  | tumor necrosis factor-alpha                      |
| TGF- $\alpha$  | transforming growth factor-alpha                 |
| G-CSF          | granulocyte-colony stimulating factor            |
| VEGF           | vascular endothelial growth factor               |
| GM-CSF         | granulocyte/macrophage-colony stimulating factor |
| MIP-1          | macrophage inflammatory protein-1                |
| MIP-1 $\alpha$ | macrophage inflammatory protein-1 alpha          |
| MIP-1 $\beta$  | macrophage inflammatory protein-1 beta           |
| MIP-3 $\alpha$ | macrophage inflammatory protein-3 alpha          |
| MIP-3 $\beta$  | macrophage inflammatory protein-3 beta           |
| IL-1 $\alpha$  | interleukin-1 alpha                              |
| IL-1 $\beta$   | interleukin-1 beta                               |
| IL-2           | interleukin-2                                    |
| IL-3           | interleukin-3                                    |
| IL-4           | interleukin-4                                    |
| IL-5           | interleukin-5                                    |
| IL-6           | interleukin-6                                    |
| IL-7           | interleukin-7                                    |
| IL-8           | interleukin-8                                    |
| IL-10          | interleukin-10                                   |
| IL-13          | interleukin-13                                   |
| IL-15          | interleukin-15                                   |
| IL-17A         | interleukin-17A                                  |
| IL-17E         | interleukin-17E                                  |

|               |                                                                  |
|---------------|------------------------------------------------------------------|
| IL-33         | interleukin-33                                                   |
| IL-12P70      | interleukin-12 <sub>P</sub> 70                                   |
| IL-1 $\alpha$ | interleukin-1 $\alpha$                                           |
| IFN- $\alpha$ | interferon-alpha                                                 |
| IFN- $\gamma$ | interferon-gamma                                                 |
| IP-10         | interferon gamma-induced protein 10                              |
| MCP-1         | monocyte chemoattractant protein-1                               |
| PDGF-AA       | platelet-derived growth factor-AA                                |
| PDGF-AA/BB    | platelet-derived growth factor-AA/BB                             |
| PD-L1         | programmed cell death ligand 1                                   |
| TRAIL         | TNF-related apoptosis-inducing ligand                            |
| FGF basic     | Fibroblast growth factor basic                                   |
| Flt-3 ligand  | Fms-like tyrosine kinase receptor 3 ligand                       |
| RANTES        | Regulated upon Activation, Normal T cell Expressed, and Secreted |

**CONTACT FOR REAGENT AND RESOURCE SHARING:** Further information and requests for resources and reagents should be addressed to the Lead Contact Lina Abi Mosleh (lina.a@ayassbioscience.com).
